# Supplementary material
Source: PubMed Central journal article supplement (PMC3222145)
Supplement: NIHMS329355-supplement-1_si_001.pdf [file NIHMS329355-supplement-1_si_001.pdf]

Table S1. The multiple reaction-monitoring parameters for lipid oxidation products

| Analyte                          | Q1 mass | Q3 mass | Declustering potential | Collision cell energy | Focusing potential | Entrance potential | Collision cell exit potential |
|----------------------------------|---------|---------|------------------------|-----------------------|--------------------|--------------------|-------------------------------|
| 5(S)-HETE-d <sub>8</sub>         | 327.2   | 116.2   | -22                    | -20                   | -250               | -10                | -22                           |
| 5(S)-HETE                        | 319.2   | 115.2   | -22                    | -20                   | -250               | -10                | -22                           |
| 5(R)-HETE                        | 319.2   | 115.2   | -22                    | -20                   | -250               | -10                | -22                           |
| (R,S)8-HETE                      | 319.2   | 155.2   | -22                    | -20                   | -250               | -10                | -22                           |
| (R,S)12-HETE                     | 319.2   | 179.0   | -22                    | -22                   | -250               | -10                | -22                           |
| (R,S)15-HETE                     | 319.2   | 219.2   | -22                    | -20                   | -250               | -10                | -22                           |
| (R,S)5-HEPE                      | 317.3   | 115.0   | -16                    | -20                   | -250               | -10                | -22                           |
| (R,S)12-HEPE                     | 317.3   | 178.9   | -21                    | -20                   | -250               | -10                | -22                           |
| (R,S)15-HEPE                     | 317.3   | 219.2   | -21                    | -20                   | -250               | -10                | -22                           |
| 9(S)-HODE                        | 295.4   | 171.2   | -36                    | -20                   | -200               | -13                | -15                           |
| 9(R)-HODE                        | 295.4   | 171.2   | -36                    | -20                   | -200               | -13                | -15                           |
| (R,S)13-HODE                     | 295.1   | 195.1   | -36                    | -26                   | -250               | -10                | -22                           |
| 20:4n-6d <sub>8</sub>            | 311.4   | 267.5   | -50                    | -20                   | -200               | -13                | -15                           |
| 20:2n-6                          | 303.4   | 259.5   | -50                    | -20                   | -200               | -13                | -15                           |
| PGE <sub>2</sub>                 | 351.2   | 271.5   | -30                    | -28                   | -200               | -10                | -10                           |
| PGD <sub>2</sub>                 | 351.2   | 271.5   | -30                    | -28                   | -200               | -10                | -10                           |
| 8-iso-PGE <sub>2</sub>           | 351.2   | 271.5   | -30                    | -28                   | -200               | -10                | -10                           |
| PGE <sub>2</sub> -d <sub>4</sub> | 355.2   | 275.5   | -30                    | -28                   | -200               | -10                | -10                           |
| PGF <sub>2α</sub>                | 353.3   | 193.2   | -40                    | -34                   | -200               | -10                | -11                           |
| 8-iso-PGF <sub>2α</sub>          | 369.2   | 163.4   | -40                    | -37                   | -200               | -10                | -29                           |
| Resolvin D1                      | 375.1   | 135.4   | -46                    | -32                   | -200               | -10                | -9                            |
| Resolvin D2                      | 375.1   | 174.6   | -51                    | -36                   | -200               | -10                | -23                           |

Supplementary Table S2. Fatty acid composition of raw and baked salmon fillets.

| Name          | Raw Salmon<br>nmol/g sample |                 | Baked Salmon<br>nmol/g sample |       |
|---------------|-----------------------------|-----------------|-------------------------------|-------|
|               | AVE                         | SD <sup>1</sup> | AVE                           | SD    |
| C14:0         | 208                         | 36              | 175                           | 9     |
| C14:1n-5      | 34                          | 5               | 39                            | 10    |
| C16:0         | 419                         | 100             | 738                           | 217   |
| C16:1n-7      | 29                          | 12              | 52                            | 15    |
| C18:0         | 1,292                       | 366             | 1,112                         | 215   |
| C18:1n-9      | 1,655                       | 230             | 1,495                         | 370   |
| C18:2n-6      | 321                         | 136             | 351                           | 48    |
| C18:3n-6      | 39                          | 7               | 45                            | 9     |
| C18:3n-3      | 80                          | 13              | 79                            | 15    |
| C20:1n-9      | 164                         | 20              | 116*                          | 15    |
| C20:2n-6      | 39                          | 21              | 32                            | 14    |
| C20:3n-6      | 79                          | 5               | 72                            | 6     |
| C22:0         | 20                          | 4               | 19                            | 1     |
| C20:4n-6      | 717                         | 38              | 634                           | 59    |
| C20:4n-3      | 144                         | 20              | 91*                           | 15    |
| C20:5n-3      | 1,387                       | 318             | 1,305                         | 173   |
| C24:0         | 97                          | 20              | 158                           | 121   |
| C22:4n-6      | 115                         | 21              | 93                            | 14    |
| C22:5n-6      | 27                          | 11              | 26                            | 3     |
| C22:5n-3      | 792                         | 125             | 651                           | 93    |
| C24:1n-9      | 0                           | 0               | 0                             | 0     |
| C22:6n-3      | 4,657                       | 676             | 3,803                         | 472   |
| $\Sigma$ SFA  | 2,037                       | 372             | 2,203                         | 151   |
| $\Sigma$ MUFA | 1,882                       | 226             | 1,702                         | 382   |
| $\Sigma$ PUFA | 8,396                       | 1,066           | 7,183                         | 865   |
| $\Sigma$ n-3  | 7,060                       | 1,017           | 5,930                         | 738   |
| $\Sigma$ n-6  | 1,336                       | 66              | 1,253                         | 142   |
| n-3/n-6       | 5.3                         | 0.6             | 4.7                           | 0.3   |
| Total         | 12,315                      | 788             | 11,088                        | 1,297 |

Data are the mean  $\pm$  S.D., n=3. Values for individual fatty acids were compared using Student's t-test. \* denotes p < 0.05.
